# Supplementary material
Source: ML conference proceedings conference paper supplement (https://openaccess.thecvf.com/content/CVPR2025/html/Luo_Viewpoint_Rosetta_Stone_CVPR_2025_paper.html)
Supplement: Supplementary file 1 [file Luo_Viewpoint_Rosetta_Stone_CVPR_2025_supplemental.pdf]

# Viewpoint Rosetta Stone: Unlocking Unpaired Ego-Exo Videos for View-invariant Representation Learning

## Supplementary Material

### 6. VIEWPOINTROSETTA Details

For the contrastive losses  $\mathcal{L}_{v-v}$ ,  $\mathcal{L}_{v-t}$ , and  $\mathcal{L}_{v-s}$  described in Section 3.4, we present the formulation for only one direction of the contrastive loss—specifically, using  $x_1$  as the anchor for the positive pair  $(x_1, x_2)$ . However, in our experiments, we compute the contrastive loss in both directions (using  $x_1$  as anchor and  $x_2$  as anchor) and use their average as the final loss.

The video encoder in Figure 2 is pretrained using video-text contrastive learning [49] on video-narration pairs from Ego-Exo4D [17]. This training ensures that the ego and exo video features processed by our Rosetta Stone Translator (RST) effectively capture meaningful information about the input videos, facilitating accurate and context-aware translation between perspectives.

### 7. Downstream Task Details

For cross-view action recognition, the dataset includes a total of 188 action classes. To provide an overview of the distribution of action labels, we present a word cloud visualization in Figure 8, where larger words indicate higher frequencies of their occurrence in the labels.

For cross-view skill assessment, we showcase a few examples of the “making omelet” task in Figure 9. Common instances of poor execution typically involve incorrect hand-holding gestures or improper procedural order.

### 8. Implementation Details

**Training details** For the video-text dual encoder, the model is trained using the Adam optimizer with hyperparameters  $(\beta_1, \beta_2) = (0.9, 0.999)$  and a weight decay of 0.01, over 5 epochs. A fixed learning rate of  $3 \times 10^{-5}$  is employed.

For the two downstream tasks—cross-view action recognition and cross-view skill assessment, which involve fine-tuning the pre-trained video encoder on task-specific data—the model is trained for 200 epochs. Training is conducted using the SGD optimizer with a weight decay of  $4 \times 10^{-5}$  and a Cosine Annealing learning rate schedule. An initial learning rate of  $3 \times 10^{-3}$  is used to optimize performance. We leverage PyTorch’s native FP16 mixed precision training and gradient checkpointing to enable efficient use of computational resources. Training is conducted with a per-GPU batch size of 32 across 32 GPUs, resulting in a total batch size of 1,024.

The temperature  $\tau$  for contrastive learning is set to 0.07, while  $\lambda_1$  and  $\lambda_2$  are set to 0.5 and 0.2, respectively. The

projection head following the dual encoders consists of a linear layer with an output dimension of 256.

**Dataset Details** Following [49], for Ego4D’s input pre-processing, each video is divided into 5-minute segments, and the shorter side is scaled to 288 pixels. For the Ego-Exo4D dataset, we use the downsampled version with a resolution of  $796 \times 448$  to improve data loading efficiency. Given the large dataset size, for Ego4D, we utilize only the videos from cooking scenarios for pretraining, while for HowTo100M, we select videos from the “Food and Entertaining” category.

### 9. Additional Results of Cross-view Retrieval

We present full quantitative results for both exo-to-ego and ego-to-exo cross-view retrieval tasks in Table 2, along with additional qualitative examples illustrated in Figure 10. The conclusion drawn from the quantitative is consistent with that in Section 4, further validating the effectiveness of our approach. Looking at Figure 10, Compared to the VI Encoder [17], our ViewpointRosetta leverages unpaired data to capture richer semantic information, enabling the retrieval of samples that are not only visually aligned with the input view but also semantically connected.

| Category                                        | Method                          | Cross-view Retrieval (ego $\rightarrow$ exo) |              |              |              | Cross-view Retrieval (exo $\rightarrow$ ego) |              |              |              |
|-------------------------------------------------|---------------------------------|----------------------------------------------|--------------|--------------|--------------|----------------------------------------------|--------------|--------------|--------------|
|                                                 |                                 | HR@1                                         | HR@5         | HR@10        | HR@20        | HR@1                                         | HR@5         | HR@10        | HR@20        |
| <i>Egocentric Video Representation Learning</i> | TimeSformer [6]                 | 1.33                                         | 6.68         | 12.87        | 22.07        | 1.46                                         | 6.95         | 12.87        | 22.82        |
|                                                 | EgoVLP [24]                     | 13.28                                        | 29.33        | 40.40        | 52.83        | 4.65                                         | 13.47        | 19.74        | 29.21        |
|                                                 | LaViLa [49]                     | 17.71                                        | 34.91        | 47.10        | 58.48        | 4.46                                         | 12.02        | 17.78        | 26.99        |
|                                                 | LaViLa* [49]                    | 19.18                                        | 43.63        | 56.91        | 70.10        | 7.87                                         | 21.93        | 32.31        | 44.81        |
| <i>View-invariant Representation Learning</i>   | Random Align *                  | 6.51                                         | 23.33        | 35.66        | 51.26        | 5.94                                         | 20.08        | 31.39        | 46.87        |
|                                                 | ActorObserverNet $\dagger$ [36] | 9.64                                         | 29.50        | 43.05        | 59.74        | 7.63                                         | 24.85        | 37.70        | 54.80        |
|                                                 | VI Encoder $\dagger$ [17]       | 8.65                                         | 29.53        | 44.31        | 60.63        | 7.05                                         | 24.40        | 37.72        | 53.92        |
|                                                 | SUM-L * [41]                    | 20.37                                        | 47.14        | 62.19        | 76.09        | 13.15                                        | 32.77        | 44.35        | 59.04        |
|                                                 | VIEWPOINTROSETTA (Ours)         | <b>25.34</b>                                 | <b>58.14</b> | <b>71.70</b> | <b>83.41</b> | <b>19.28</b>                                 | <b>47.21</b> | <b>61.78</b> | <b>74.17</b> |

Table 2. Full results for cross-view retrieval when choosing different k values for the hit rate (HR). \* means having access to all the same paired and unpaired data as ours. † means only training with paired data.

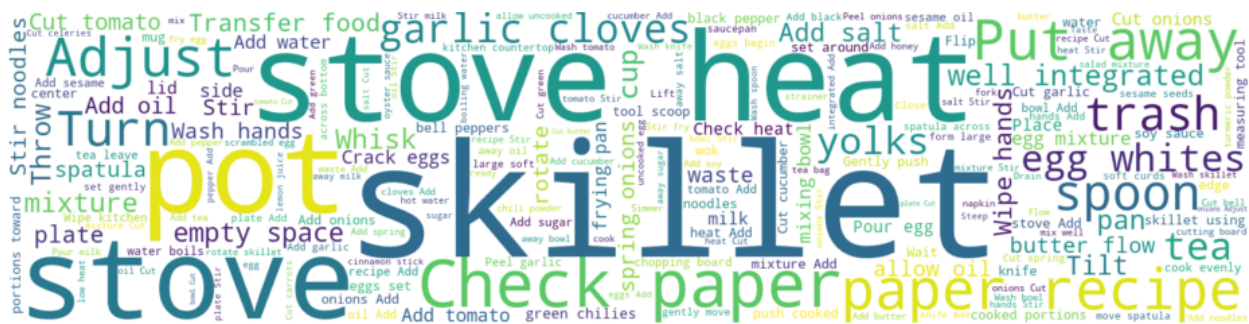

Figure 8. Word cloud visualization of cross-view action recognition task’s action label distribution. Larger words indicate higher frequencies of their occurrence in the labels.

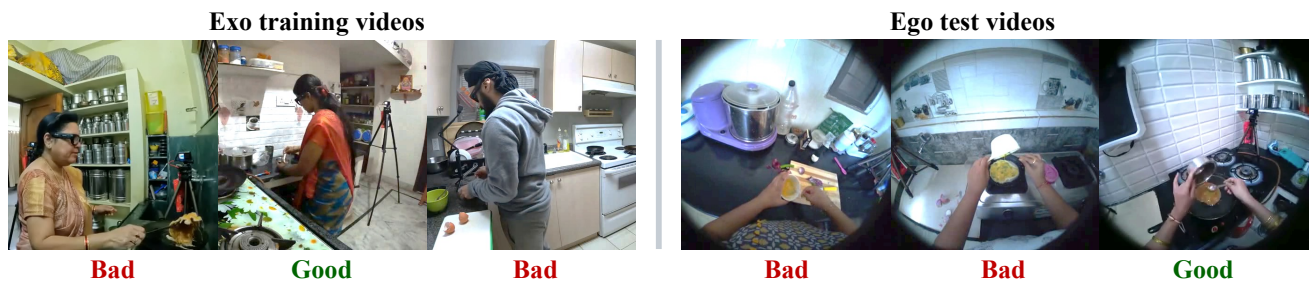

Figure 9. Visualization of cross-view skill assessment task’s training exo samples and test ego videos. Common instances of bad execution typically involve incorrect hand-holding gestures or improper procedural order.

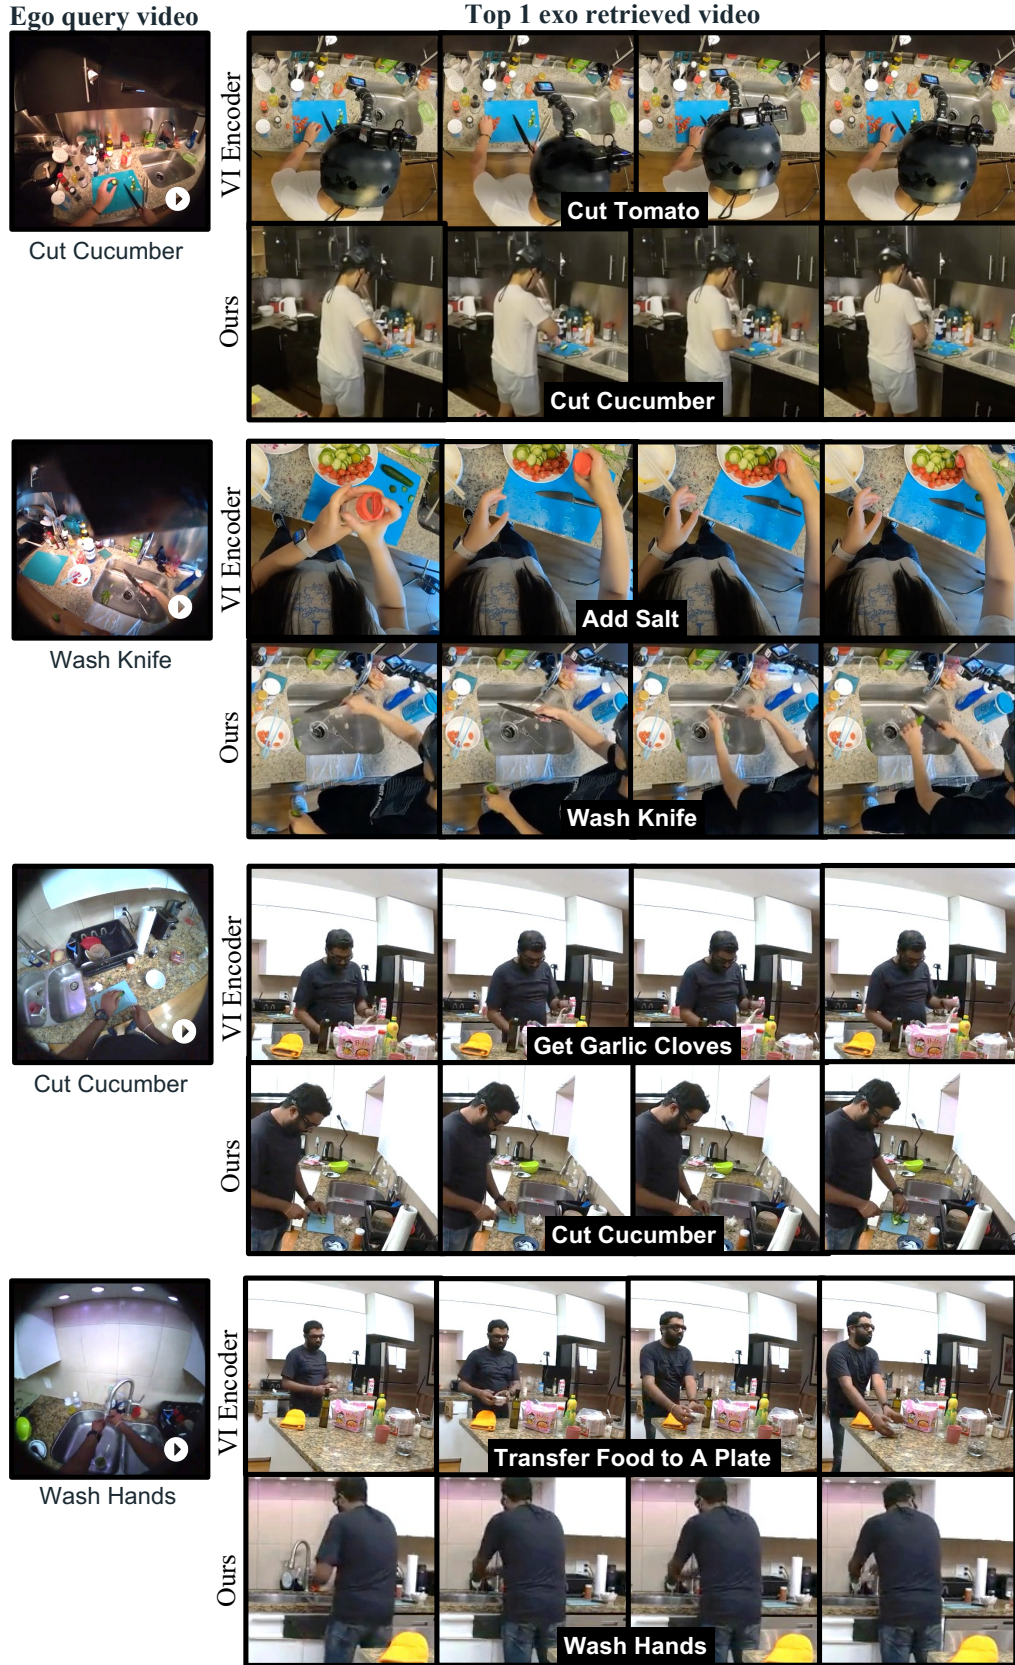

Figure 10. Extras qualitative results of ego-to-exo cross-view retrieval. Compared to the VI Encoder [17], our ViewpointRosetta unlocks unpaired data to capture rich semantic information, enabling retrieval of samples that are not only visually similar to the input view but also semantically related.
